# Supplementary material for: Effect of Polymer Matrix on Inelastic Strain Development in PI- and PEI-Based Composites Reinforced with Short Carbon Fibers under Low-Cyclic Fatigue
Source: MDPI journal article supplement (doi:10.3390/polym15051228), 2023-02-28
Supplement: s1 [file s1]

Article

# Effect of Polymer Matrix on Inelastic Strain Development in PI- and PEI-Based Composites Reinforced with Short Carbon Fibers under Low-Cyclic Fatigue

Sergey V. Panin <sup>1,2,\*</sup>, Alexey A. Bogdanov <sup>1,2</sup>, Alexander V. Eremin <sup>1</sup>, Dmitry G. Buslovich <sup>3</sup>, Ivan S. Shilko <sup>4</sup>

## Supplementary materials

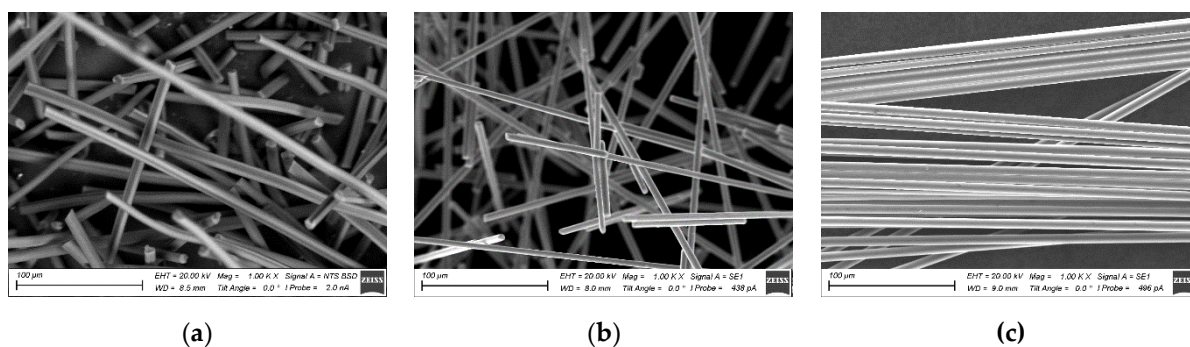

**Figure S1.** The SEM micrographs of fillers loaded in the PI- and PEI-based composites: “UVI-12 100μm” (a); “Tenax®-A 200μm” (b); “Tenax®-A 2000μm” (c).

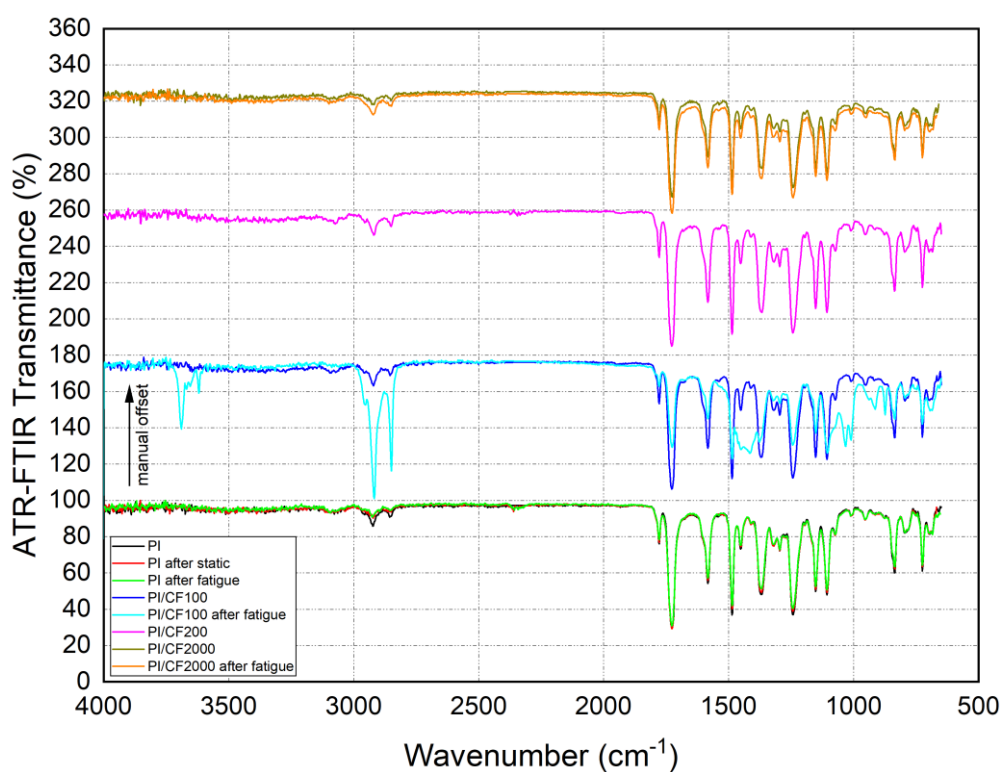

**Figure S2.** The FTIR spectra for the neat PI and PI-based composites before and after the static and fatigue tests.

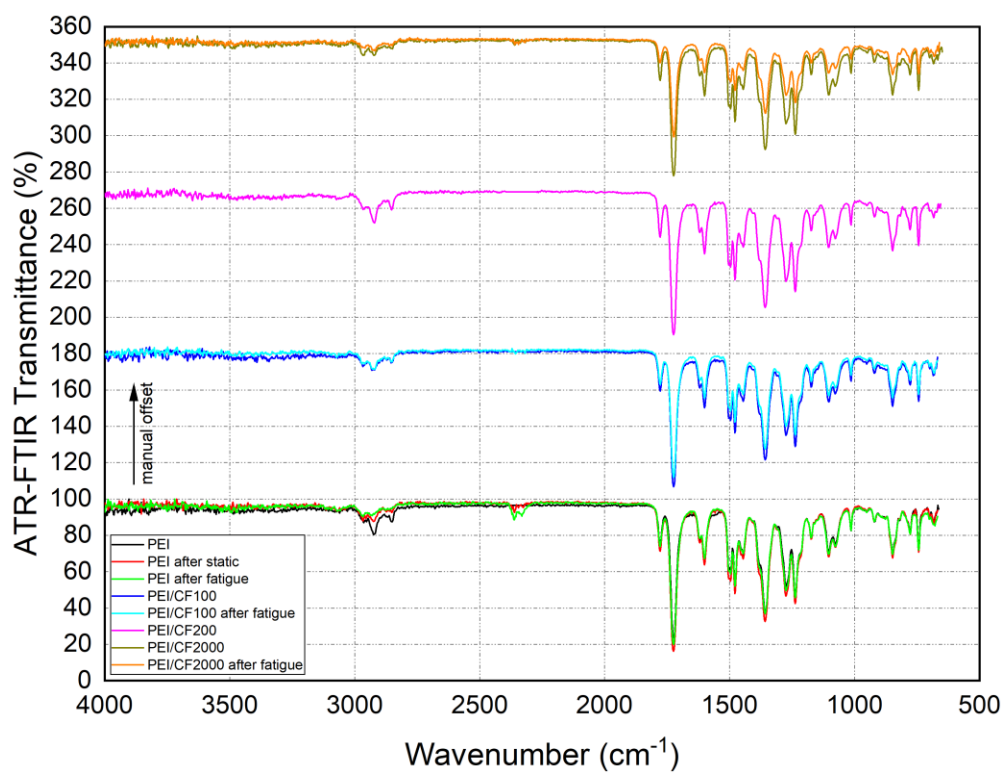

**Figure S3.** The FTIR spectra for the neat PEI and PEI-based composites before and after the static and fatigue tests.
